# Supplementary material for: Manganese(ii) complexes of tetradentate 4N ligands with diazepane backbones for catalytic olefin epoxidation: effect of nucleophilicity of peroxo complexes on reactivity
Source: Royal Society of Chemistry journal article supplement (doi:10.1039/c3ra44729d), 2014-01-01
Supplement: c3ra44729d.pdf [file c3ra44729d.pdf]

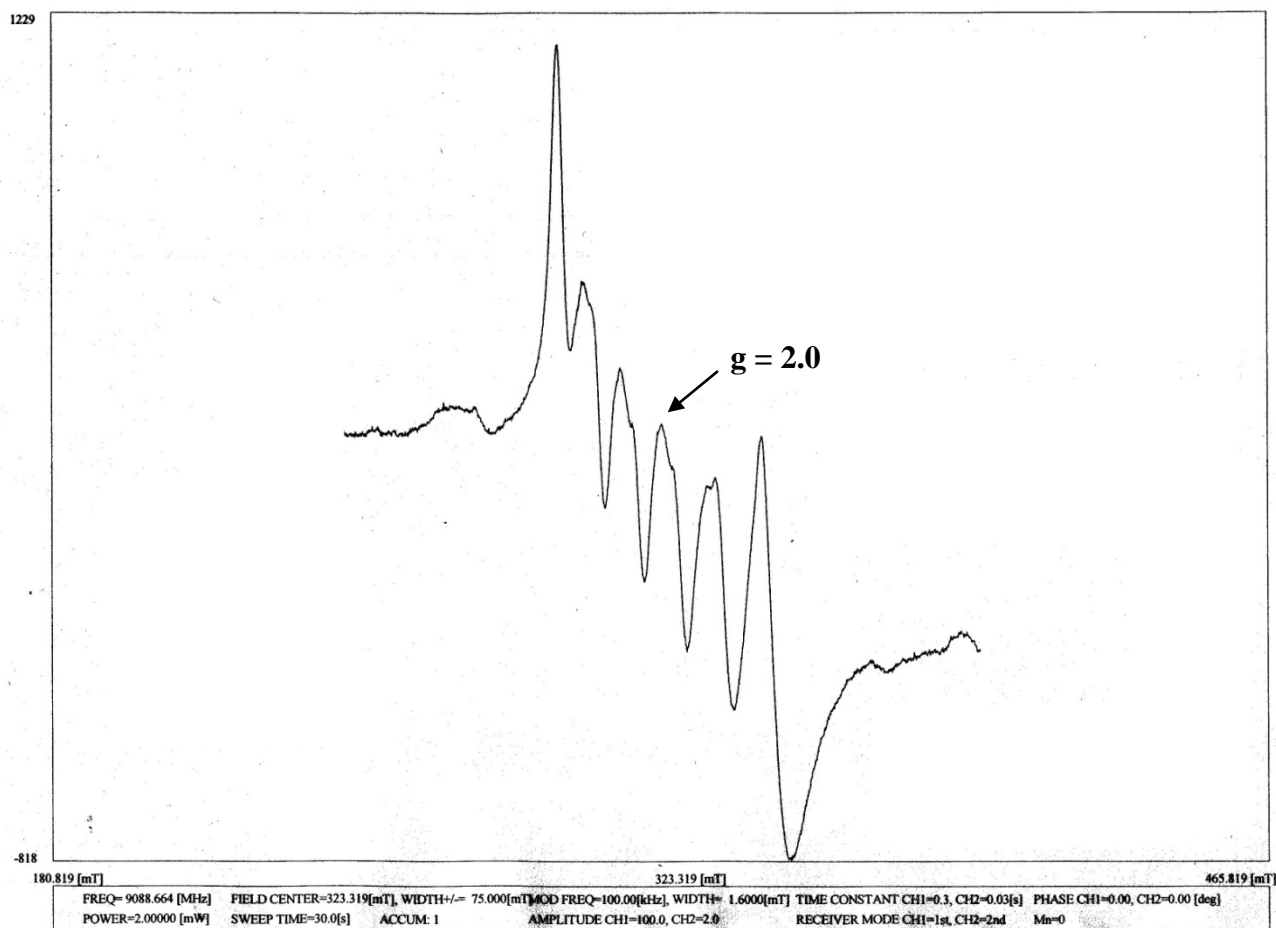

**Fig. S1** X-band EPR spectra of [Mn(L)]1- 4 at LNT. Instrumental parameters: microwaves, 9.08 GHz at 2 mW; modulation 100 KHz.
